# Supplementary material
Source: PubMed Central journal article supplement (PMC4323381)
Supplement: NIHMS661416-supplement-01.pdf [file NIHMS661416-supplement-01.pdf]

# ACCELERATED PUBLICATION SUPPLEMENTARY ONLINE DATA microRNA regulation of expression of the cystic fibrosis transmembrane conductance regulator gene

Austin E. GILLEN, Nehal GOSALIA, Shih-Hsing LEIR and Ann HARRIS<sup>1</sup>

Human Molecular Genetics Program, Children's Memorial Research Center, Chicago, IL 60614, U.S.A., and Department of Pediatrics, Northwestern University Feinberg School of Medicine, Chicago, IL 60611, U.S.A.

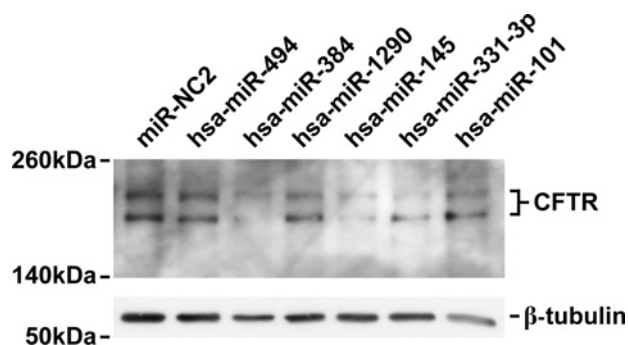

**Figure S1** Repression of CFTR protein expression in Caco-2 cells

Expression of CFTR protein in Caco-2 cells, measured by Western blot analysis, probed with the 570 antibody after transient transfection of the indicated miRNA mimics. miRNAs are ordered by TargetScan context score, with the strongest predictions on the left-hand side. miR-NC2, negative control. The molecular mass in kDa is indicated on the left-hand side.

**Table S1** Primer sequences

Primer sequences used for cloning the *SLC12A2* 3' UTR and mutating the pMIR-CFTR 3' UTR are listed, along with their genomic location (hg19 assembly).

| Primer              | Sequence (5'→3')                                      | Genomic location (hg19)  |
|---------------------|-------------------------------------------------------|--------------------------|
| SLC12A2-3'UTR-F     | GCACTAGTTCGTGGGAATCATCAGAGTGTC                        | chr5:127522279-127522306 |
| SLC12A2-3'UTR-R     | GCACGCGTCCACAAGCTGGCAAAGACTTATT                       | chr5:127525396-127525419 |
| pMIR-CFTRmut145*    | CTTATATAAACCCTGAAGTTACCGTTATCATTACTTAATCATAACCCTAAGAA | chr7:117307562-117307616 |
| pMIR-CFTRmut494-F** | CTAGGAAATATTTATTTAATAATGCATCAAACATATATAACAATGCTGT     | chr7:117308280-117308329 |
| pMIR-CFTRmut494-R** | ACAGCATTGTTATATATGTTGATGCATTTAAAATAAATATTTCCTAG       | chr7:117308280-117308329 |

\*Used with the QuikChange® Lightning Multi Site-Directed Mutagenesis Kit.

\*\*Used with the QuikChange® Lightning Site-Directed Mutagenesis Kit.

Received 14 April 2011/13 June 2011; accepted 20 June 2011  
Published as BJ Immediate Publication 20 June 2011, doi:10.1042/BJ20110672

<sup>1</sup> To whom correspondence should be addressed (email ann-harris@northwestern.edu).
